# Supplementary material for: Engineering of Thermal Stability in a Cold-Active Oligo-1,6-Glucosidase from Exiguobacterium sibiricum with Unusual Amino Acid Content
Source: MDPI journal article supplement (doi:10.3390/biom11081229), 2021-08-17
Supplement: s1 [file s1]

**Supplementary Material** to the manuscript

**“Engineering of Thermal Stability in a Cold-Active Oli-go-1,6-Glucosidase from *Exiguobacterium sibiricum* with Un-usual Amino Acid Content” by Berlina et al.**

**Table S1.** Nucleotide sequences of the primers used in the study for gene construction and mutagenesis. Recognition sequences of restrictases used for gene cloning are underlined.

| Primer name | Sequence, 5'-3'                               |
|-------------|-----------------------------------------------|
| 1739f       | ATCAT <u>ACCAT</u> GGAACGTAAATGGTGGCAC        |
| 1739r       | ACAT <u>CTCGAG</u> CCGCGTCGTCGGTAGAC          |
| A109Pf      | ACCATTCTCGGACGAGCACC <u>CAT</u> GGTTTGCAGAG   |
| A109Pr      | GTGCTCGTCCGACGAATGGTTGATGACCAA                |
| S130Pf      | GGACTATTACATTTGGAGACCAGCCAATGAAGACGG          |
| S130Pr      | TCTCCAAATGTAATAGTCCCGGTATGGATT                |
| E176Pf      | CTGATCTGAACTGGGAAAACCCAAA <u>ACT</u> GCGTCAAG |
| E176Pr      | GTTTTCCAGTTCAGATCAGGTTGCTTTTT                 |
| K441Pf      | CGACGGGTACACCCTGGTTACCAGTTAATCCGAAC           |
| K441Pr      | TAACCAGGGTGTACCCGTCGTAAATCCGGC                |

**Table S2.** The content of selected amino acid residues in the protein sequences of oligo-1,6-glucosidases from *E. sibiricum* (EsOgl), *B. cereus* (BceOgl), and *G. thermoglucosidasius* (GthOgl). Values were obtained using the ProtParam program.

| Residue | Content, % |        |        |
|---------|------------|--------|--------|
|         | EsOgl      | BceOgl | GthOgl |
| Arg     | 4.8        | 3.6    | 5.9    |
| Asn     | 5.4        | 6.6    | 5.0    |
| Asp     | 8.4        | 6.8    | 8.0    |
| Gln     | 2.9        | 2.7    | 2.5    |
| Glu     | 8.6        | 11.1   | 8.9    |
| Gly     | 6.6        | 6.5    | 6.6    |
| Lys     | 4.5        | 7.3    | 7.5    |
| Pro     | 5.0        | 3.4    | 5.7    |
| Ser     | 5.4        | 5.0    | 5.0    |
| Thr     | 5.7        | 4.1    | 4.1    |

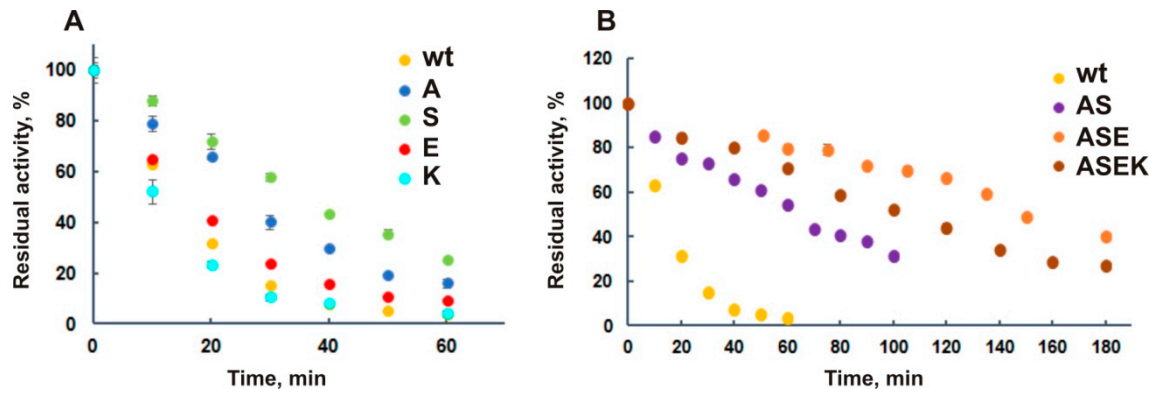

**Figure S1.** Kinetics of inactivation of the wild-type EsOgl and its mutant variants with single (A) and multiple (B) substitutions at 45 °C. Abbreviations: wt, wild-type EsOgl; A, A109P; S, S130P; E, E176P; K, K441P; AS, A109P/S130P; ASE, A109P/S130P/E176P; ASEK, A109P/S130P/E176P/K441P. Activity before incubation was taken as 100%. Mean values of three experiments are presented  $\pm$  RSD.

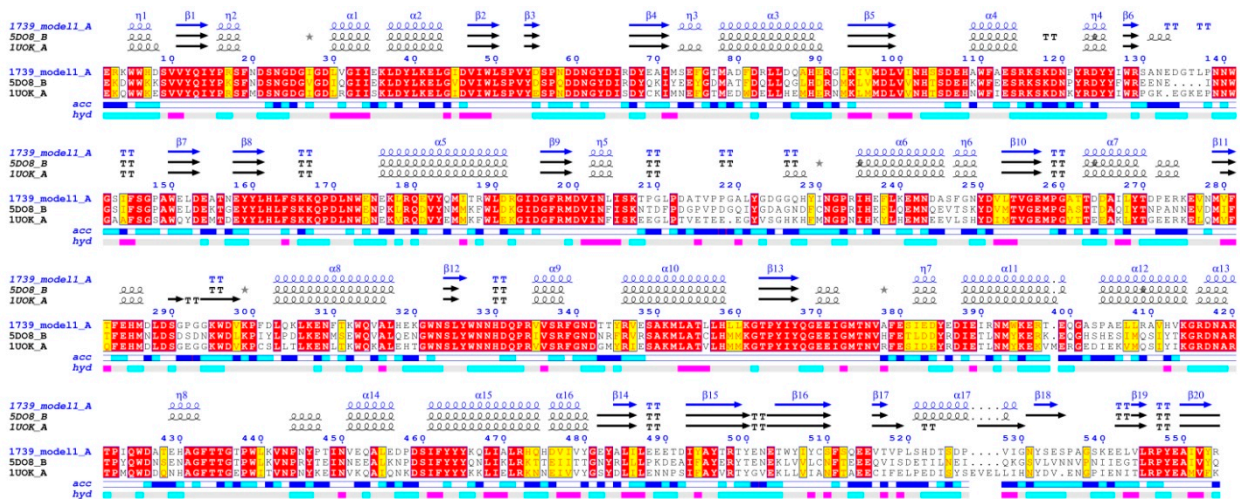

**Figure S2.** Structural alignment of EsOgl model with oligo-1,6-glucosidases from *Bacillus cereus* (PDB 1UOK) and *Listeria monocytogenes* (PDB 5DO8). Secondary structure elements were identified using ENDscript. Helices are shown by squiggles, strands are indicated by arrows, turns are indicated by TT letters, and 3<sub>10</sub>-helices are indicated by η letters.

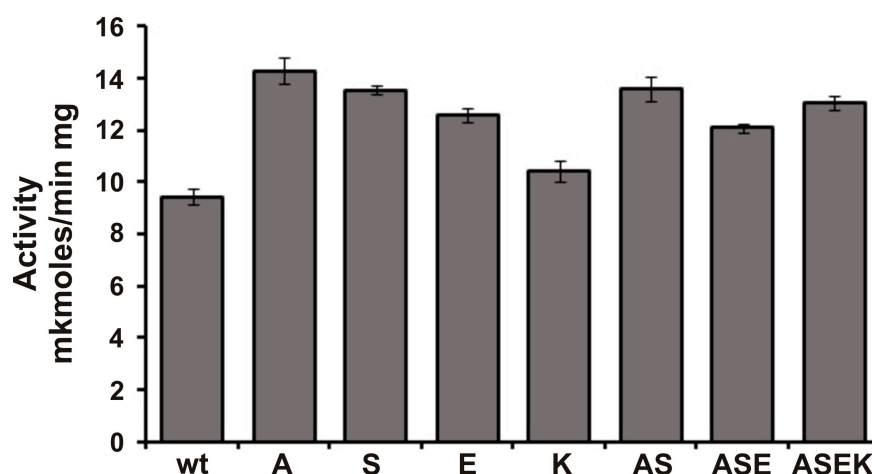

**Figure S3.** Enzymatic activities of the wild type EsOgl and the mutant variants. The reaction mixture containing 0.36 mM *p*NPG and 1 mkg of indicated protein in 33 mM potassium phosphate buffer, pH 7.0 was incubated for 15 min at 25°C. One unit of activity was determined as an amount of enzyme releasing 1  $\mu$ mol of *p*-nitrophenol per minute. The specific activity was calculated as a number of activity units per 1 mg of protein.

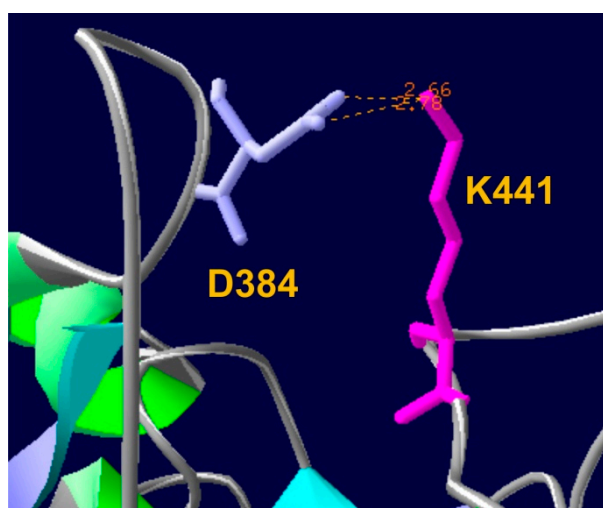

**Figure S4.** Localization of the sidechains of the Asp384 and Lys441 residues in EsOgl 3D structure. The model of EsOgl 3D structure was obtained using the SWISS-MODEL service and visualized by Swiss PDB Viewer.
